# Supplementary material for: Event-based surveillance at health facility and community level in low-income and middle-income countries: a systematic review
Source: PubMed Central journal article supplement — BMJ Glob Health. 2019 Dec 10;4(6):e001878. doi: 10.1136/bmjgh-2019-001878 (PMC6936563; doi:10.1136/bmjgh-2019-001878), 2019-12-10
Supplement: bmjgh-2019-001878supp001.pdf [file bmjgh-2019-001878supp001.pdf]

Kuehne A, Keating P, Polonsky J, Haskew C, Schenkel K, le Polain de Waroux O, Ratnayake R:  
Event-based surveillance in low- and middle-income countries: a systematic review

### Supplementary file 1: Search strategies

#### **Ovid MEDLINE(R) and Epub Ahead of Print, In-Process & Other Non-Indexed Citations and Daily 1946 to August 20, 2018**

1. western pacific regional office.af.
2. WPRO.af.
3. south east asian regional office.af.
4. SEARO.af.
5. african regional office.af.
6. AFRO.af.
7. Eastern Mediterranean Regional office.af.
8. EMRO.af.
9. Pan American Health Organization.af.
10. PAHO.af.
11. ((developing or less\* developed or under developed or underdeveloped or middle income or low\* income or underserved or under served or deprived or poor\*) adj (economy or economies)).ti,ab.
12. ((developing or less\* developed or under developed or underdeveloped or middle income or low\* income or underserved or under served or deprived or poor\*) adj (countr\* or nation? or population? or world)).ti,ab.
13. (low\* adj (gdp or gnp or gross domestic or gross national)).ti,ab.
14. (low adj3 middle adj3 countr\*).ti,ab.
15. (lmic or Imics or third world or lami countr\*).ti,ab.
16. transitional countr\*.ti,ab.
17. global south.ti,ab.
18. Developing Countries/
19. "africa south of the sahara"/ or africa, central/ or africa, eastern/ or africa, southern/ or africa, western/

20. ("africa south of the sahara" or sub-saharan africa or central africa or eastern africa or southern africa or western africa).ti,ab.
21. "Democratic People's Republic of Korea"/
22. (north korea or (democratic people\* republic adj2 korea)).ti,ab.
23. Cambodia/
24. cambodia.ti,ab.
25. Indonesia/
26. indonesia.ti,ab.
27. Micronesia/
28. Kiribati.ti,ab.
29. Laos/
30. (laos or (lao adj1 democratic republic)).ti,ab.
31. (marshall island\* or caroline island\* or ellice island\* or gilbert island\* or johnston island\* or mariana island\* or micronesia or pacific island\*).ti,ab.
32. Mongolia/
33. mongolia.ti,ab.
34. Myanmar/
35. (myanmar or burma).ti,ab.
36. Papua New Guinea/
37. Papua New Guinea.ti,ab.
38. Philippines/
39. Philippines.ti,ab.
40. Timor-Leste/
41. Timor-Leste.ti,ab.
42. Vanuatu/
43. Vanuatu.ti,ab.
44. Vietnam/
45. (Viet Nam or Vietnam).ti,ab.
46. American Samoa/

47. american samoa.ti,ab.
48. exp China/
49. china.ti,ab.
50. Fiji/
51. fiji.ti,ab.
52. Malaysia/
53. malaysia.ti,ab.
54. marshall islands.ti,ab.
55. nauru.ti,ab.
56. samoa/
57. "independent state of samoa"/
58. ("independent state of samoa" or (samoa not american samoa) or western samoa or navigator islands or samoan islands).ti,ab.
59. Thailand/
60. Thailand.ti,ab.
61. Tonga/
62. tonga.ti,ab.
63. Tuvalu.ti,ab.
64. Armenia/
65. Armenia.ti,ab.
66. "Georgia (Republic)"/
67. Kosovo/
68. Kosovo.ti,ab.
69. Kyrgyzstan/
70. (kyrgyzstan or kyrgyz republic or kirghizia or kirghiz).ti,ab.
71. Moldova/
72. Moldova.ti,ab.
73. Tajikistan/

74. tajikistan.ti,ab.
75. Ukraine/
76. Ukraine.ti,ab.
77. Uzbekistan/
78. Uzbekistan.ti,ab.
79. Albania/
80. Albania.ti,ab.
81. Azerbaijan/
82. Azerbaijan.ti,ab.
83. "Republic of Belarus"/
84. (belarus or byelarus or belorussia).ti,ab.
85. Bosnia-Herzegovina/
86. (bosnia or herzegovina).ti,ab.
87. Bulgaria/
88. Bulgaria.ti,ab.
89. Croatia/
90. croatia.ti,ab.
91. Kazakhstan/
92. (Kazakhstan or kazakh).ti,ab.
93. "Macedonia (Republic)"/
94. Macedonia.ti,ab.
95. Montenegro/
96. Montenegro.ti,ab.
97. Romania/
98. Romania.ti,ab.
99. exp Russia/
100. USSR/

101. (Russia or Russian Federation or USSR or Union of Soviet Socialist Republics or Soviet Union).mp.
102. Serbia/
103. serbia.ti,ab.
104. Turkey/
105. turkey.ti,ab. not animal/
106. Turkmenistan/
107. Turkmenistan.ti,ab.
108. Yugoslavia/
109. yugoslavia.ti,ab.
110. Haiti/
111. Haiti.ti,ab.
112. Bolivia/
113. Bolivia.ti,ab.
114. El Salvador/
115. El Salvador.ti,ab.
116. Guatemala/
117. Guatemala.ti,ab.
118. Honduras/
119. Honduras.ti,ab.
120. Nicaragua/
121. Nicaragua.ti,ab.
122. Argentina/
123. Argentina.ti,ab.
124. Belize/
125. Belize.ti,ab.
126. Brazil/
127. Brazil.ti,ab.

128. Colombia/
129. Colombia.ti,ab.
130. Costa Rica/
131. Costa Rica.ti,ab.
132. Cuba/
133. Cuba.ti,ab.
134. Dominica/
135. Dominica.ti,ab.
136. Dominican Republic/
137. Dominican Republic.ti,ab.
138. Ecuador/
139. Ecuador.ti,ab.
140. Grenada/
141. Grenada.ti,ab.
142. Guyana/
143. Guyana.mp.
144. Jamaica/
145. Jamaica.ti,ab.
146. Mexico/
147. Mexico.ti,ab.
148. exp Panama/
149. Panama.ti,ab.
150. Paraguay/
151. Paraguay.mp.
152. Peru/
153. Peru.ti,ab.
154. Saint Lucia/
155. (St Lucia or Saint Lucia).ti,ab.

156. "Saint Vincent and the Grenadines"/
157. Grenadines.ti,ab.
158. Suriname/
159. Suriname.ti,ab.
160. Venezuela/
161. Venezuela.ti,ab.
162. Djibouti/
163. (Djibouti or French Somaliland).ti,ab.
164. Egypt/
165. Egypt.ti,ab.
166. Jordan/
167. Jordan.ti,ab.
168. Morocco/
169. Morocco.ti,ab.
170. Syria/
171. (Syria or Syrian Arab Republic).ti,ab.
172. Tunisia/
173. tunisia.mp.
174. Gaza.ti,ab.
175. Yemen/
176. Yemen.ti,ab.
177. Algeria/
178. Algeria.ti,ab.
179. Iran/
180. Iran.ti,ab.
181. Iraq/
182. Iraq.ti,ab.
183. Jordan/

184. Jordan.ti,ab.
185. Lebanon/
186. Lebanon.ti,ab.
187. Libya/
188. Libya.ti,ab.
189. Afghanistan/
190. Afghanistan.ti,ab.
191. Nepal/
192. Nepal.ti,ab.
193. Bangladesh/
194. Bangladesh.ti,ab.
195. Bhutan/
196. Bhutan.ti,ab.
197. exp India/
198. India.ti,ab.
199. Pakistan/
200. Pakistan.ti,ab.
201. Sri Lanka/
202. Sri Lanka.ti,ab.
203. Indian Ocean Islands/
204. Maldives.ti,ab.
205. Benin/
206. (Benin or Dahomey).ti,ab.
207. Burkina Faso/
208. (Burkina Faso or Burkina Fasso or Upper Volta).ti,ab.
209. Burundi/
210. Burundi.ti,ab.
211. Central African Republic/

212. (Central African Republic or Ubangi-Shari).ti,ab.
213. Chad/
214. Chad.ti,ab.
215. Comoros/
216. (Comoros or Comoro Islands or Mayotte or Iles Comores).ti,ab.
217. "Democratic Republic of the Congo"/
218. ((democratic republic adj2 congo) or belgian congo or zaire).ti,ab.
219. Eritrea/
220. Eritrea.ti,ab.
221. Ethiopia/
222. Ethiopia.ti,ab.
223. Gambia/
224. Gambia.ti,ab.
225. Guinea/
226. (Guinea not (New Guinea or Guinea Pig\* or Guinea Fowl)).ti,ab.
227. Guinea-Bissau/
228. (Guinea-Bissau or Portuguese Guinea).ti,ab.
229. Liberia/
230. Liberia.ti,ab.
231. Madagascar/
232. (Madagascar or Malagasy Republic).ti,ab.
233. Malawi/
234. (Malawi or Nyasaland).ti,ab.
235. Mali/
236. Mali.ti,ab.
237. Mozambique/
238. (Mozambique or Mocambique or Portuguese East Africa).ti,ab.
239. Niger/

240. (Niger not (Aspergillus or Peptococcus or Schizothorax or Cruciferae or Gobius or Lasius or Agelastes or Melanosuchus or radish or Parastromateus or Orius or Apergillus or Parastromateus or Stomoxys)).ti,ab.
241. Rwanda/
242. (Rwanda or Ruanda).ti,ab.
243. Senegal/
244. senegal.ti,ab.
245. Sierra Leone/
246. Sierra Leone.mp.
247. Somalia/
248. Somalia.ti,ab.
249. South Sudan/
250. south sudan.ti,ab.
251. Tanzania/
252. (Tanzania or Tanganyika or Zanzibar).ti,ab.
253. Togo/
254. (Togo or Togolese Republic).ti,ab.
255. Uganda/
256. Uganda.ti,ab.
257. Zimbabwe/
258. (Zimbabwe or Rhodesia).ti,ab.
259. Angola/
260. angola.ti,ab.
261. Cameroon/
262. Cameroon.ti,ab.
263. Cape Verde/
264. (Cape Verde or Cabo Verde).ti,ab.
265. Congo/
266. (congo not ((democratic republic adj3 congo) or congo red or crimean-congo)).ti,ab.

267. Cote d'Ivoire/
268. (Cote d'Ivoire or Ivory Coast).ti,ab.
269. Ghana/
270. (Ghana or Gold Coast).ti,ab.
271. Kenya/
272. kenya.mp.
273. Lesotho/
274. (Lesotho or Basutoland).ti,ab.
275. Mauritania/
276. Mauritania.ti,ab.
277. Nigeria/
278. Nigeria.ti,ab.
279. Atlantic Islands/
280. (sao tome adj2 principe).ti,ab.
281. Sudan/
282. (Sudan not south sudan).ti,ab.
283. Swaziland/
284. Swaziland.ti,ab.
285. Zambia/
286. (Zambia or Northern Rhodesia).ti,ab.
287. Botswana/
288. (Botswana or Bechuanaland or Kalahari).ti,ab.
289. Equatorial Guinea/
290. (Equatorial Guinea or Spanish Guinea).ti,ab.
291. Gabon/
292. (Gabon or Gabonese Republic).ti,ab.
293. Mauritius/
294. (Mauritius or Agalega Islands).ti,ab.

295. Namibia/
296. Namibia.ti,ab.
297. South Africa/
298. South Africa.ti,ab.
299. or/11-298 [ALL LMIC]
300. 1 or 2 or 3 or 4 or 5 or 6 or 7 or 8 or 9 or 10
301. 299 or 300
302. limit 301 to (english or french or german or portuguese or spanish)
303. outbreak\$.af.
304. epidemic\$.af.
305. 303 or 304
306. exp Population Surveillance/
307. (Hotline\$ or key informant\$ or village elder\$ or village chief\$ or village health worker\$ or community health worker\$ or community health volunteer\$ or village health volunteer\$ or religious leader\$ or imam\$ or traditional healer\$ or traditional leader\$ or village chief\$ or grave\$ or community leader\$ or early warning).af.
308. 305 and 306 and 307
309. ((event\$ adj2 surveillance) not drug event\$ surveillance not adverse event\$ surveillance not ventilator associated adverse event\$ not ventilator associated event\$ not dialysis event\$ surveillance not dialysis adverse event\$ not Hazardous Substance\$ Emergency Event\$ surveillance).af.
310. (rumo?r\$ adj3 surveillance).af.
311. (early warning alert and response).af.
312. (EWAR or ewars or ewarn).af.
313. cluster surveillance.af.
314. event-based surveillance.af.
315. 309 or 310 or 311 or 312 or 313 or 314
316. 308 or 315
317. 302 and 316

**EMBASE 1974 to 2018 August 20**

1. western pacific regional office.af.
2. wpro.af.
3. south east asian regional office.af.
4. searo.af.
5. african regional office.af.
6. afro.af.
7. Eastern Mediterranean Regional office.af.
8. emro.af.
9. Pan American Health Organization.af.
10. paho.af.
11. 1 or 2 or 3 or 4 or 5 or 6 or 7 or 8 or 9 or 10
12. developing country/
13. low income country/
14. middle income country/
15. ((developing or less\* developed or under developed or underdeveloped or middle income or low\* income or underserved or under served or deprived or poor\*) adj (economy or economies)).ti,ab.
16. ((developing or less\* developed or under developed or underdeveloped or middle income or low\* income or underserved or under served or deprived or poor\*) adj (countr\* or nation? or population? or world)).ti,ab.
17. (low\* adj (gdp or gnp or gross domestic or gross national)).ti,ab.
18. (low adj3 middle adj3 countr\*).ti,ab.
19. (lmic or Imics or third world or lami countr\*).ti,ab.
20. transitional countr\*.ti,ab.
21. global south.ti,ab.
22. "Africa south of the Sahara"/
23. ("africa south of the sahara" or sub-saharan africa or central africa or eastern africa or southern africa or western africa).ti,ab.
24. Botswana/

25. (Botswana or Bechuanaland or Kalahari).ti,ab.
26. Equatorial Guinea/
27. (Equatorial Guinea or Spanish Guinea).ti,ab.
28. Gabon/
29. (Gabon or Gabonese Republic).ti,ab.
30. Mauritius/
31. (Mauritius or Agalega Islands).ti,ab.
32. Namibia/
33. Namibia.ti,ab.
34. South Africa/
35. South Africa.ti,ab.
36. Angola/
37. angola.ti,ab.
38. Cameroon/
39. Cameroon.ti,ab.
40. Cape Verde/
41. (Cape Verde or Cabo Verde).ti,ab.
42. Congo/
43. (congo not ((democratic republic adj3 congo) or congo red or crimean-congo)).ti,ab.
44. Cote d'Ivoire/
45. (Cote d'Ivoire or Ivory Coast).ti,ab.
46. Ghana/
47. (Ghana or Gold Coast).ti,ab.
48. Kenya/
49. kenya.mp.
50. Lesotho/
51. (Lesotho or Basutoland).ti,ab.
52. Mauritania/

53. Mauritania.ti,ab.
54. Nigeria/
55. Nigeria.ti,ab.
56. "Sao Tome and Principe"/
57. (sao tome adj2 principe).ti,ab.
58. Sudan/
59. (Sudan not south sudan).ti,ab.
60. Swaziland/
61. Swaziland.ti,ab.
62. Zambia/
63. (Zambia or Northern Rhodesia).ti,ab.
64. Benin/
65. (Benin or Dahomey).ti,ab.
66. Burkina Faso/
67. (Burkina Faso or Burkina Fasso or Upper Volta).ti,ab.
68. Burundi/
69. Burundi.ti,ab.
70. Central African Republic/
71. (Central African Republic or Ubangi-Shari).ti,ab.
72. Chad/
73. Chad.ti,ab.
74. Comoros/
75. (Comoros or Comoro Islands or Mayotte or Iles Comores).ti,ab.
76. "Democratic Republic Congo"/
77. ((democratic republic adj2 congo) or belgian congo or zaire).ti,ab.
78. Eritrea/
79. Eritrea.ti,ab.
80. Ethiopia/

81. Ethiopia.ti,ab.
82. Gambia/
83. Gambia.ti,ab.
84. Guinea/
85. (Guinea not (New Guinea or Guinea Pig\* or Guinea Fowl)).ti,ab.
86. Guinea-Bissau/
87. (Guinea-Bissau or Portuguese Guinea).ti,ab.
88. Liberia/
89. Liberia.ti,ab.
90. Madagascar/
91. (Madagascar or Malagasy Republic).ti,ab.
92. Malawi/
93. (Malawi or Nyasaland).ti,ab.
94. Mali/
95. Mali.ti,ab.
96. Mozambique/
97. (Mozambique or Mocambique or Portuguese East Africa).ti,ab.
98. Niger/
99. (Niger not (Aspergillus or Peptococcus or Schizothorax or Cruciferae or Gobius or Lasius or Agelastes or Melanosuchus or radish or Parastromateus or Orius or Aperingillus or Parastromateus or Stomoxys)).ti,ab.
100. Rwanda/
101. (Rwanda or Ruanda).ti,ab.
102. Senegal/
103. senegal.ti,ab.
104. Sierra Leone/
105. Sierra Leone.mp.
106. exp Somalia/
107. Somalia.ti,ab.

108. South Sudan/
109. south sudan.ti,ab.
110. Tanzania/
111. (Tanzania or Tanganyika or Zanzibar).ti,ab.
112. Togo/
113. (Togo or Togolese Republic).ti,ab.
114. Uganda/
115. Uganda.ti,ab.
116. Zimbabwe/
117. (Zimbabwe or Rhodesia).ti,ab.
118. Maldives/
119. Maldives.ti,ab.
120. Algeria/
121. Algeria.ti,ab.
122. Iran/
123. Iran.ti,ab.
124. exp Iraq/
125. Iraq.ti,ab.
126. Jordan/
127. Jordan.ti,ab.
128. Lebanon/
129. Lebanon.ti,ab.
130. Libyan Arab Jamahiriya/
131. Libya.ti,ab.
132. Argentina/
133. Argentina.ti,ab.
134. Belize/
135. Belize.ti,ab.

136. exp Brazil/
137. Brazil.ti,ab.
138. Colombia/
139. Colombia.ti,ab.
140. Costa Rica/
141. Costa Rica.ti,ab.
142. Cuba/
143. Cuba.ti,ab.
144. Dominica/
145. Dominica.ti,ab.
146. Dominican Republic/
147. Dominican Republic.ti,ab.
148. Ecuador/
149. Ecuador.ti,ab.
150. Grenada/
151. Grenada.ti,ab.
152. Guyana/
153. Guyana.mp.
154. Jamaica/
155. Jamaica.ti,ab.
156. Mexico/
157. Mexico.ti,ab.
158. exp Panama/
159. Panama.ti,ab.
160. Paraguay/
161. Paraguay.mp.
162. Peru/
163. Peru.ti,ab.

164. Saint Lucia/
165. (St Lucia or Saint Lucia).ti,ab.
166. "Saint Vincent and the Grenadines"/
167. Grenadines.ti,ab.
168. Suriname/
169. Suriname.ti,ab.
170. Venezuela/
171. Venezuela.ti,ab.
172. Albania/
173. Albania.ti,ab.
174. Azerbaijan/
175. Azerbaijan.ti,ab.
176. Belarus/
177. (belarus or byelarus or belorussia).ti,ab.
178. exp "Bosnia and Herzegovina"/
179. (bosnia or herzegovina).ti,ab.
180. Bulgaria/
181. Bulgaria.ti,ab.
182. Croatia/
183. croatia.ti,ab.
184. Kazakhstan/
185. (Kazakhstan or kazakh).ti,ab.
186. "Macedonia (Republic)"/
187. Macedonia.ti,ab.
188. "Montenegro (republic)"/
189. Montenegro.ti,ab.
190. Romania/
191. Romania.ti,ab.

192. exp Russian Federation/
193. USSR/
194. (Russia or Russian Federation or USSR or Union of Soviet Socialist Republics or Soviet Union).mp.
  
195. exp Serbia/
196. serbia.ti,ab.
197. "Turkey (republic)"/
198. turkey.ti,ab. not animal/
199. Turkmenistan/
200. Turkmenistan.ti,ab.
201. Yugoslavia/
202. yugoslavia.ti,ab.
203. exp Samoan Islands/
204. american samoa.ti,ab.
205. exp China/
206. china.ti,ab.
207. Fiji/
208. fiji.ti,ab.
209. Malaysia/
210. malaysia.ti,ab.
211. Marshall Islands/
212. marshall islands.ti,ab.
213. Nauru/
214. nauru.ti,ab.
215. ("independent state of samoa" or (samoa not american samoa) or western samoa or navigator islands or samoan islands).ti,ab.
216. Thailand/
217. Thailand.ti,ab.
218. Tonga/

219. tonga.ti,ab.
220. Tuvalu/
221. Tuvalu.ti,ab.
222. Bangladesh/
223. Bangladesh.ti,ab.
224. Bhutan/
225. Bhutan.ti,ab.
226. exp India/
227. India.ti,ab.
228. exp Pakistan/
229. Pakistan.ti,ab.
230. Sri Lanka/
231. Sri Lanka.ti,ab.
232. Djibouti/
233. (Djibouti or French Somaliland).ti,ab.
234. Egypt/
235. Egypt.ti,ab.
236. Jordan/
237. Jordan.ti,ab.
238. Morocco/
239. Morocco.ti,ab.
240. Syrian Arab Republic/
241. (Syria or Syrian Arab Republic).ti,ab.
242. Tunisia/
243. tunisia.mp.
244. Palestine/
245. Gaza.ti,ab.
246. Yemen/

247. Yemen.ti,ab.
248. Bolivia/
249. Bolivia.ti,ab.
250. El Salvador/
251. El Salvador.ti,ab.
252. Guatemala/
253. Guatemala.ti,ab.
254. Honduras/
255. Honduras.ti,ab.
256. Nicaragua/
257. Nicaragua.ti,ab.
258. Armenia/
259. Armenia.ti,ab.
260. "Georgia (Republic)"/
261. Kosovo/
262. Kosovo.ti,ab.
263. Kyrgyzstan/
264. (kyrgyzstan or kyrgyz republic or kirghizia or kirghiz).ti,ab.
265. Moldova/
266. Moldova.ti,ab.
267. Tajikistan/
268. tajikistan.ti,ab.
269. exp Ukraine/
270. Ukraine.ti,ab.
271. Uzbekistan/
272. Uzbekistan.ti,ab.
273. Cambodia/
274. cambodia.ti,ab.

275. exp Indonesia/
276. indonesia.ti,ab.
277. Kiribati/
278. Kiribati.ti,ab.
279. Laos/
280. (laos or (lao adj1 democratic republic)).ti,ab.
281. "Marshall Islands"/
282. "Federated States of Micronesia"/
283. (marshall island\* or caroline island\* or ellice island\* or gilbert island\* or johnston island\* or mariana island\* or micronesia or pacific island\*).ti,ab.
284. Mongolia/
285. mongolia.ti,ab.
286. Myanmar/
287. (myanmar or burma).ti,ab.
288. Papua New Guinea/
289. Papua New Guinea.ti,ab.
290. Philippines/
291. Philippines.ti,ab.
292. Timor-Leste/
293. Timor-Leste.ti,ab.
294. Vanuatu/
295. Vanuatu.ti,ab.
296. Viet Nam/
297. (Viet Nam or vietnam).ti,ab.
298. Afghanistan/
299. Afghanistan.ti,ab.
300. Nepal/
301. Nepal.ti,ab.

302. Haiti/
303. Haiti.ti,ab.
304. "North Korea"/
305. (north korea or (democratic people\* republic adj2 korea)).ti,ab.
306. or/12-305 [ALL LMICs]
307. limit 306 to (english or french or german or portuguese or spanish)
308. 11 or 307
309. outbreak\$.af.
310. epidemic\$.af.
311. 309 or 310
312. exp Population Surveillance/
313. (Hotline\$ or key informant\$ or village elder\$ or village chief\$ or village health worker\$ or community health worker\$ or community health volunteer\$ or village health volunteer\$ or religious leader\$ or imam\$ or traditional healer\$ or traditional leader\$ or village chief\$ or grave\$ or community leader\$ or early warning).af.
314. 311 and 312 and 313
315. event-based surveillance.af.
316. ((event\$ adj2 surveillance) not drug event\$ surveillance not adverse event\$ surveillance not ventilator associated adverse event\$ not ventilator associated event\$ not dialysis event\$ surveillance not dialysis adverse event\$ not Hazardous Substance\$ Emergency Event\$ surveillance).af.
317. (rumo?r\$ adj3 surveillance).af.
318. (early warning alert and response).af.
319. (EWAR or ewars or ewarn).af.
320. (epidemic\$ adj2 surveillance).af.
321. (outbreak\$ adj2 surveillance).af.
322. 315 or 316 or 317 or 318 or 319 or 320 or 321
323. 314 or 322
324. 308 and 323

**Global Health 1910 to 2018 Week 32**

Line 1-296 identical to MEDLINE search

297. outbreak\$.af.

298. epidemic\$.af.

299. 297 or 298

300. (Hotline\$ or key informant\$ or village elder\$ or village chief\$ or village health worker\$ or community health worker\$ or community health volunteer\$ or village health volunteer\$ or religious leader\$ or imam\$ or traditional healer\$ or traditional leader\$ or village chief\$ or grave\$ or community leader\$ or early warning).af.

301. ((event\$ adj2 surveillance) not drug event\$ surveillance not adverse event\$ surveillance not ventilator associated adverse event\$ not ventilator associated event\$ not dialysis event\$ surveillance not dialysis adverse event\$ not Hazardous Substance\$ Emergency Event\$ surveillance).af.

302. (rumo?r\$ adj3 surveillance).af.

303. (early warning alert and response).af.

304. (EWAR or ewars or ewarn).af.

305. cluster surveillance.af.

306. event-based surveillance.af.

307. 301 or 302 or 303 or 304 or 305 or 306

308. exp surveillance/

309. 299 and 300 and 308

310. 307 or 309

311. 296 and 310

**Northern Light Life Sciences Conference Abstracts 2010 - 2018 Week 32**

Line 1-296 identical to MEDLINE search

297. outbreak\$.af.

298. epidemic\$.af.

299. 297 or 298

300. (Hotline\$ or key informant\$ or village elder\$ or village chief\$ or village health worker\$ or community health worker\$ or community health volunteer\$ or village health volunteer\$ or religious leader\$ or imam\$ or traditional healer\$ or traditional leader\$ or village chief\$ or grave\$ or community leader\$ or early warning).af.

301. ((event\$ adj2 surveillance) not drug event\$ surveillance not adverse event\$ surveillance not ventilator associated adverse event\$ not ventilator associated event\$ not dialysis event\$ surveillance not dialysis adverse event\$ not Hazardous Substance\$ Emergency Event\$ surveillance).af.

302. (rumo?r\$ adj3 surveillance).af.

303. (early warning alert and response).af.

304. (EWAR or ewars or ewarn).af.

305. cluster surveillance.af.

306. event-based surveillance.af.

307. 301 or 302 or 303 or 304 or 305 or 306

308. surveillance.mp. [mp=title, abstract, heading words, text]

309. rumo?r\*.af.

310. 300 or 309

311. 299 and 308 and 310

312. 307 or 311

**CINAHL Plus with full text, EBSCOhost Research Databases 1937 – 21 August 2018**

S12 S7 OR S11

Search modes -Boolean/Phrase

S11 S8 AND S9 AND S10

Search modes -Boolean/Phrase

S10 (Hotline\* or key informant\* or village elder\* or village chief\* or village health worker\* or community health worker\* or community health volunteer\* or village health volunteer\* or religious leader\* or imam\* or traditional healer\* or traditional leader\* or village chief\* or grave\* or community leader\* or early warning)

Expanders – Add additional thesaurus terms to query

Search modes - Boolean/Phrase

S9 outbreaks or pandemics or epidemics

Expanders – Add additional thesaurus terms to query

Search modes - Boolean/Phrase

S8 surveillance

Expanders – Add additional thesaurus terms to query

Search modes -Boolean/Phrase

S7 S1 OR S2 OR S3 OR S4 OR S5 OR S6

Search modes -Boolean/Phrase

S6 (event\* N2 surveillance) not drug event\* not adverse event\* not ventilator associated adverse event\* not ventilator associated event\* not dialysis event\* not dialysis adverse event\* not Hazardous Substance\* Emergency Event\*

Expanders – Add additional thesaurus terms to query

Search modes -Boolean/Phrase

S5 rumo#r\* N3 surveillance

Expanders – Add additional thesaurus terms to query

Search modes - Boolean/Phrase

S4 cluster surveillance

Expanders – Add additional thesaurus terms to query

Search modes - Boolean/Phrase

S3 ewar OR ewars OR ewarn

Expanders – Add additional thesaurus terms to query

Search modes - Boolean/Phrase

S2 early warning alert and response

Expanders – Add additional thesaurus terms to query

Search modes - Boolean/Phrase

S1 event-based surveillance

Expanders – Add additional thesaurus terms to query

Search modes - Boolean/Phrase

**Africa wide information, EBSCOhost Research Databases 1937 – 21 August 2018**

S12 S9 OR S11

Search modes - Boolean/Phrase

S11 S2 AND S7 AND S10

Search modes - Boolean/Phrase

S10 (Hotline\* or key informant\* or village elder\* or village chief\* or village health worker\* or community health worker\* or community health volunteer\* or village health volunteer\* or religious leader\* or imam\* or traditional healer\* or traditional leader\* or village chief\* or grave\* or community leader\* or early warning)

Expanders – Add additional thesaurus terms to query

Search modes - Boolean/Phrase

S9 S1 OR S3 OR S4 OR S5 OR S6 OR S8

Search modes - Boolean/Phrase

S8 (event\* N2 surveillance) not drug event\* not adverse event\* not ventilator associated adverse event\* not ventilator associated event\* not dialysis event\* not dialysis adverse event\* not Hazardous Substance\* Emergency Event\*

Expanders – Add additional thesaurus terms to query

Search modes - Boolean/Phrase

S7 outbreaks or pandemics or epidemics

Expanders – Add additional thesaurus terms to query

Search modes - Boolean/Phrase

S6 event-based surveillance

Expanders – Add additional thesaurus terms to query

Search modes - Boolean/Phrase

S5 early warning alert and response

Expanders – Add additional thesaurus terms to query

Search modes - Boolean/Phrase

S4 ewar OR ewars OR ewarn

Expanders – Add additional thesaurus terms to query

Search modes - Boolean/Phrase

S3 rumo?r\* N3 surveillance

Expanders – Add additional thesaurus terms to query

Search modes - Boolean/Phrase

S2 surveillance

Expanders – Add additional thesaurus terms to query

Search modes - Boolean/Phrase

S1 cluster surveillance

Expanders – Add additional thesaurus terms to query

Search modes - Boolean/Phrase
