# Supplementary material for: Event-based surveillance at health facility and community level in low-income and middle-income countries: a systematic review
Source: PubMed Central journal article supplement — BMJ Glob Health. 2019 Dec 10;4(6):e001878. doi: 10.1136/bmjgh-2019-001878 (PMC6936563; doi:10.1136/bmjgh-2019-001878), 2019-12-10
Supplement: bmjgh-2019-001878supp002.pdf [file bmjgh-2019-001878supp002.pdf]

Kuehne A, Keating P, Polonsky J, Haskew C, Schenkel K, le Polain de Waroux O, Ratnayake R: Event-based surveillance in low- and middle-income countries: a systematic review

### Supplementary file 2: Full-text articles screened and reasons for exclusion

Among all 94 records identified by systematic (n=68), grey (n=6) or backwards citation (n= 20) literature search for full-text extraction, 82 (87%) were peer-reviewed publications (65 identified by systematic search, one by grey literature search, 16 by backwards citation search), four were unpublished manuscript currently under preparation or peer-review (all identified through grey literature search by reaching out to partners), three (3.2%) were conference abstracts (all identified by systematic search), three (3.2%) were agency reports (one identified by grey literature search, two by backwards citation search), one was a WHO publication (identified by backwards citation search) and one was a MPH thesis (identified by backwards search). Of the 94 records that were identified, 17 records were included; for the remaining 77 records the reasons for exclusion are listed below. For four of these 77 records that we had wished to review on full text, we were not able to obtain and assess full-texts or additional information: two conference abstracts, one MPH thesis and one agency report.

| Publication title                                                                                                                                                                                                                | Reason for exclusion                                                  | Identified through | Type of publication       |
|----------------------------------------------------------------------------------------------------------------------------------------------------------------------------------------------------------------------------------|-----------------------------------------------------------------------|--------------------|---------------------------|
| Asiedu-Bekoe, F., et al. (2017). "Strengthening Capacity For Community Event-Based Surveillance - Experiences From a Pilot Launch In Ghana." APHA - American Public Health Association Annual Meeting 2017. 4.-8.11.2017 Atlanta | Full-text/ Presentation/ additional information could not be obtained | Systematic search  | Conference abstract       |
| Azziz-Baumgartner, E., et al. (2012). "Early detection of pandemic (H1N1) 2009, Bangladesh." <i>Emerging Infectious Diseases</i> 18(1): 146-149.                                                                                 | IBS and EBS not evaluated separately                                  | Systematic search  | Peer-reviewed publication |
| Balajee, S. A., et al. (2016). "Global Health Security: Building Capacities for Early Event Detection, Epidemiologic Workforce, and Laboratory Response." <i>Health security</i> 14(6): 424-432.                                 | No EBS system (as defined for this paper) described                   | Systematic search  | Peer-reviewed publication |
| Bilve, A., et al. (2014). "Establishing an early warning alert and response network following the Solomon Islands tsunami in 2013." <i>Bulletin of the World Health Organization</i> 92(11): 844-848.                            | IBS and EBS not evaluated separately                                  | Systematic search  | Peer-reviewed publication |
| Blake, I. M., et al. (2016). "Faster Detection of Poliomyelitis Outbreaks to Support Polio Eradication." <i>Emerging Infectious Diseases</i> 22(3): 449-456.                                                                     | Does not present data collected with EBS                              | Systematic search  | Peer-reviewed publication |
| Boisson, E. V., et al. (2012). "Cricket World Cup: a stress test for the surveillance system in the Caribbean." <i>The West Indian medical journal</i> 61(1): 84-89.                                                             | IBS and EBS not evaluated separately                                  | Systematic search  | Peer-reviewed publication |

|                                                                                                                                                                                                                                                          |                                                                       |                   |                           |
|----------------------------------------------------------------------------------------------------------------------------------------------------------------------------------------------------------------------------------------------------------|-----------------------------------------------------------------------|-------------------|---------------------------|
| Chau, P. D. (2007). "Evaluation of disease surveillance system to detect disease outbreak in Cambodia." <i>Journal of the National Institute of Public Health</i> 56(4): 412-413.                                                                        | Does not present data collected with EBS                              | Systematic search | Peer-reviewed publication |
| Cordes, K. M., et al. (2017). "Real-Time Surveillance in Emergencies Using the Early Warning Alert and Response Network." <i>Emerging Infectious Diseases</i> 23: S131-S137.                                                                             | Does not present data collected with EBS                              | Systematic search | Peer-reviewed publication |
| Craig, A. T., et al. (2016). "Early warning epidemic surveillance in the Pacific island nations: an evaluation of the Pacific syndromic surveillance system." <i>Tropical Medicine &amp; International Health</i> 21(7): 917-927.                        | IBS and EBS not evaluated separately                                  | Systematic search | Peer-reviewed publication |
| Crowe, S., et al. (2015). "A plan for community event-based surveillance to reduce Ebola transmission - Sierra Leone, 2014-2015." <i>MMWR: Morbidity &amp; Mortality Weekly Report</i> 64(3): 70-73.                                                     | Does not present data collected with EBS                              | Systematic search | Peer-reviewed publication |
| Ekmekci, P. E. (2016). "An Assessment of Coherence Between Early Warning and Response Systems and Serious Cross-Border Health Threats in the European Union and Turkey." <i>Disaster medicine and public health preparedness</i> 10(6): 883-892.         | Does not present data collected with EBS                              | Systematic search | Peer-reviewed publication |
| Fleischauer, A. T. and J. Gaines (2017). "Enhancing Surveillance for Mass Gatherings: The Role of Syndromic Surveillance." <i>Public Health Reports</i> 132: 95S-98S.                                                                                    | Does not present data collected with EBS                              | Systematic search | Peer-reviewed publication |
| Gomez, J., et al. (2009). "Pandemic influenza in a southern hemisphere setting: the experience in Peru from May to September, 2009." <i>Eurosurveillance</i> 14(42): 19371.                                                                              | No EBS system (as defined for this paper) described                   | Systematic search | Peer-reviewed publication |
| Hanafusa, S., et al. (2012). "A surveillance model for human avian influenza with a comprehensive surveillance system for local-priority communicable diseases in South Sulawesi, Indonesia." <i>Tropical Medicine and Health</i> 40(4): 141-147.        | IBS and EBS not evaluated separately                                  | Systematic search | Peer-reviewed publication |
| Hanvoravongchai, P., et al. (2010). "Pandemic influenza preparedness and health systems challenges in Asia: results from rapid analyses in 6 Asian countries." <i>BMC public health</i> 10: 322-322.                                                     | No EBS system (as defined for this paper) described                   | Systematic search | Peer-reviewed publication |
| Higgins, E. M., et al. (2016). "Community Event-Based Surveillance (CEBS) For Ebola Virus Disease (EVD) In Sierra Leone: Alert Demographics By Sex And Age, February 2015-June 2016." <i>International Journal of Infectious Diseases</i> 53 Suppl: S115 | Full-text/ Presentation/ additional information could not be obtained | Systematic search | Conference abstract       |

|                                                                                                                                                                                                                                                |                                                     |                   |                           |
|------------------------------------------------------------------------------------------------------------------------------------------------------------------------------------------------------------------------------------------------|-----------------------------------------------------|-------------------|---------------------------|
| Ikram, M. S., et al. (2014). "Communicable disease control in Afghanistan." <i>Global Public Health</i> 9 Suppl 1: S43-57.                                                                                                                     | No EBS system (as defined for this paper) described | Systematic search | Peer-reviewed publication |
| Kant, L. and S. K. Krishnan (2010). "Information and communication technology in disease surveillance, India: a case study." <i>BMC public health</i> 10 Suppl 1: S11.                                                                         | Does not present data collected with EBS            | Systematic search | Peer-reviewed publication |
| Lam, S. K. (1990). "Development of an early warning system for dengue outbreaks." <i>Southeast Asian Journal of Tropical Medicine and Public Health</i> 21(4): 685-685.                                                                        | No EBS system (as defined for this paper) described | Systematic search | Peer-reviewed publication |
| Lopez, A. L., et al. (2015). "Epidemiology of cholera in the Philippines." <i>PLoS neglected tropical diseases</i> 9(1): e3440-e3440.                                                                                                          | Does not present data collected with EBS            | Systematic search | Peer-reviewed publication |
| Lorthe, T. S., et al. (2018). "Evaluation of the EpiCore outbreak verification system." <i>Bulletin of the World Health Organization</i> 96(5): 327-334.                                                                                       | No EBS system (as defined for this paper) described | Systematic search | Peer-reviewed publication |
| Machache, E. M., et al. (2014). "Community Health Workers Can Effectively Implement Disease Surveillance of Priority Diseases At Village Level In Kenya." <i>AHAIC African Health Agenda International Conference, 24.-26.11.2014, Nairobi</i> | Does not present data collected with EBS            | Systematic search | Peer-reviewed publication |
| Mala, P., et al. (2014). "Establishment of EWARNS system for the Syrian crisis: Experiences and challenges." <i>International Journal of Infectious Diseases</i> 21(SUPPL. 1): 280.                                                            | Does not present data collected with EBS            | Systematic search | Peer-reviewed publication |
| Mofleh, J. and A. Jamil (2014). "Evaluation of measles surveillance systems in Afghanistan-2010." <i>Journal of Public Health and Epidemiology</i> 6(11): 407-416.                                                                             | IBS and EBS not evaluated separately                | Systematic search | Peer-reviewed publication |
| Muhjazi, G., et al. (2013). "An early warning and response system for Syria." <i>The Lancet</i> 382(9910): 2066.                                                                                                                               | Does not present data collected with EBS            | Systematic search | Peer-reviewed publication |
| Murhekar, M. V., et al. (2015). "On the transmission pattern of Kyasanur Forest disease [KFD] in India." <i>Infectious diseases of poverty</i> 4: 37-37.                                                                                       | No EBS system (as defined for this paper) described | Systematic search | Peer-reviewed publication |
| Naser, A. M., et al. (2012). "Cluster Surveillance For Detecting Encephalitis Outbreaks In Bangladesh." <i>International Conference on Emerging Infectious Diseases 2012, Atlanta, 11.-14. March 2012</i>                                      | Does not present data collected with EBS            | Systematic search | Peer-reviewed publication |

|                                                                                                                                                                                                                 |                                                     |                   |                           |
|-----------------------------------------------------------------------------------------------------------------------------------------------------------------------------------------------------------------|-----------------------------------------------------|-------------------|---------------------------|
| Orellana, C. (2005). "Tackling infectious diseases in the tsunami's wake." <i>The Lancet Infectious Diseases</i> 5(2): 73-73.                                                                                   | No EBS system (as defined for this paper) described | Systematic search | Peer-reviewed publication |
| Otieno, C. F., et al. (2012). "Reliability of community health worker collected data for planning and policy in a peri-urban area of Kisumu, Kenya." <i>Journal of community health</i> 37(1): 48-53.           | No EBS system (as defined for this paper) described | Systematic search | Peer-reviewed publication |
| Oyas, H., et al. (2018). "Enhanced surveillance for Rift Valley Fever in livestock during El Nino rains and threat of RVF outbreak, Kenya, 2015-2016." <i>PLoS neglected tropical diseases</i> 12(4): e0006353. | Animal/livestock surveillance only                  | Systematic search | Peer-reviewed publication |
| Perry, H. B., et al. (2016). "Community health worker programmes after the 2013-2016 Ebola outbreak." <i>WHO Bulletin</i> 94: 551-553.                                                                          | Does not present data collected with EBS            | Systematic search | Peer-reviewed publication |
| Polonsky, J., et al. (2013). "Public health surveillance after the 2010 haiti earthquake: the experience of <i>médecins sans frontières</i> ." <i>PLoS currents</i> 5.                                          | No EBS system (as defined for this paper) described | Systematic search | Peer-reviewed publication |
| Rahim, M., et al. (2010). "The impact of the disease early warning system in responding to natural disasters and conflict crises in Pakistan." <i>Eastern Mediterranean Health Journal</i> 16: S114-121.        | No EBS system (as defined for this paper) described | Systematic search | Peer-reviewed publication |
| Rahman, M. and A. Chakraborty (2012). "Nipah virus outbreaks in Bangladesh: a deadly infectious disease." <i>WHO South-East Asia journal of public health</i> 1(2): 208-212.                                    | Does not present data collected with EBS            | Systematic search | Peer-reviewed publication |
| Rehman, N. A., et al. (2016). "Fine-grained dengue forecasting using telephone triage services." <i>Science advances</i> 2(7): ee1501215-ee1501215.                                                             | No EBS system (as defined for this paper) described | Systematic search | Peer-reviewed publication |
| Rosewell, A., et al. (2013). "Mobile phone-based syndromic surveillance system, Papua New Guinea." <i>Emerging Infectious Diseases</i> 19(11): 1811-1818.                                                       | IBS and EBS not evaluated separately                | Systematic search | Peer-reviewed publication |
| Roure, C., et al. (2005). "Surveillance, early warning alert, and response: communicable and vector-borne diseases." <i>Prehospital and Disaster Medicine</i> 20(6): 399-403.                                   | Does not present data collected with EBS            | Systematic search | Peer-reviewed publication |
| Runge-Ranzinger, S., et al. (2014). "Dengue disease surveillance: an updated systematic literature review." <i>Tropical Medicine &amp; International Health</i> 19(9): 1116-1160.                               | No EBS system (as defined for this paper) described | Systematic search | Peer-reviewed publication |

|                                                                                                                                                                                                                                                                  |                                                     |                   |                           |
|------------------------------------------------------------------------------------------------------------------------------------------------------------------------------------------------------------------------------------------------------------------|-----------------------------------------------------|-------------------|---------------------------|
| Sabatinelli, G., et al. (2012). "Early warning disease surveillance after a flood emergency - Pakistan, 2010." <i>Morbidity and Mortality Weekly Report</i> 61(49): 1002-1007.                                                                                   | No EBS system (as defined for this paper) described | Systematic search | Peer-reviewed publication |
| Samaan, G., et al. (2005). "Rumor surveillance and avian influenza H5N1." <i>Emerging Infectious Diseases</i> 11(3): 463-466.                                                                                                                                    | No EBS system (as defined for this paper) described | Systematic search | Peer-reviewed publication |
| Sazzad, H. M., et al. (2013). "Japanese encephalitis outbreak in western Bangladesh, 2011." <i>American Journal of Tropical Medicine and Hygiene</i> 89(5 SUPPL. 1): 366.                                                                                        | Does not present data collected with EBS            | Systematic search | Peer-reviewed publication |
| Shortus, Matthew, et al. (2016). "Vector-control response in a post-flood disaster setting, Honiara, Solomon Islands, 2014." <i>Western Pacific surveillance and response journal: WPSAR</i> 7(1): 38-43.                                                        | No EBS system (as defined for this paper) described | Systematic search | Peer-reviewed publication |
| Siziya, S., et al. (2016). "Surveillance: An important strategy for timely detection of outbreaks or epidemics of arboviral diseases." <i>International Public Health Journal</i> 8(1): 3-5.                                                                     | No EBS system (as defined for this paper) described | Systematic search | Peer-reviewed publication |
| Sparrow, A., et al. (2016). "Cholera in the time of war: implications of weak surveillance in Syria for the WHO's preparedness-a comparison of two monitoring systems." <i>BMJ Global Health</i> 1(3): e000029-e000029.                                          | No EBS system (as defined for this paper) described | Systematic search | Peer-reviewed publication |
| Teixeira, M. G., et al. (2012). "Evaluation of Brazil's public health surveillance system within the context of the International Health Regulations (2005)." <i>Revista panamericana de salud publica = Pan American journal of public health</i> 32(1): 49-55. | Does not present data collected with EBS            | Systematic search | Peer-reviewed publication |
| Tissera, H., et al. (2016). "Sustainable dengue prevention and control through a comprehensive integrated approach: the Sri Lankan perspective." <i>WHO South-East Asia journal of public health</i> 5(2): 106-112.                                              | No EBS system (as defined for this paper) described | Systematic search | Peer-reviewed publication |
| Vong, S., et al. (2016). "Assessment of Ebola virus disease preparedness in the WHO South-East Asia Region." <i>Bulletin of the World Health Organization</i> 94(12): 913-924.                                                                                   | No EBS system (as defined for this paper) described | Systematic search | Peer-reviewed publication |
| WHO (2002). "Early warning and response network [EWARN], southern Sudan." <i>Weekly Epidemiological Record = Relevé épidémiologique hebdomadaire</i> 77(4): 26-27.                                                                                               | Does not present data collected with EBS            | Systematic search | Peer-reviewed publication |

|                                                                                                                                                                                                                                      |                                                     |                        |                              |
|--------------------------------------------------------------------------------------------------------------------------------------------------------------------------------------------------------------------------------------|-----------------------------------------------------|------------------------|------------------------------|
| WHO (2004). "Setting up an early warning system for epidemic-prone diseases in the Darfur humanitarian crisis." <i>Weekly Epidemiological Record = Relevé épidémiologique hebdomadaire</i> 79(27): 246-247.                          | Does not present data collected with EBS            | Systematic search      | Peer-reviewed publication    |
| WHO (2005). "Epidemic-prone disease surveillance and response after the tsunami in Aceh Province, Indonesia." <i>Weekly Epidemiological Record = Relevé épidémiologique hebdomadaire</i> 80(18): 160-164.                            | No EBS system (as defined for this paper) described | Systematic search      | Peer-reviewed publication    |
| WHO (2010). "Early warning surveillance and response in emergencies: WHO Technical Workshop, December 2009." <i>Weekly Epidemiological Record</i> 85(14/15): 129-136.                                                                | Does not present data collected with EBS            | Systematic search      | Peer-reviewed publication    |
| WHO (2017). "Early warning, alert and response system in emergencies: a field experience of a novel WHO project in north-east Nigeria." <i>Weekly Epidemiological Record = Relevé épidémiologique hebdomadaire</i> 92(5): 45-52.     | No EBS system (as defined for this paper) described | Systematic search      | Peer-reviewed publication    |
| Wilkinson, A. L., et al. (2017). "Reporting deaths among children aged <5 years after the ebola virus disease epidemic - Bombali District, Sierra Leone, 2015-2016." <i>Morbidity and Mortality Weekly Report</i> 66(41): 1116-1118. | No EBS system (as defined for this paper) described | Systematic search      | Peer-reviewed publication    |
| Zhang, H., et al. (2017). "Surveillance and early warning systems of infectious disease in China: From 2012 to 2014." <i>International Journal of Health Planning &amp; Management</i> 32(3): 329-338.                               | IBS and EBS not evaluated separately                | Systematic search      | Peer-reviewed publication    |
| Zulu, Z., et al. (2018). "Three parallel information systems for malaria elimination in Swaziland, 2010-2015: Are the numbers the same?" <i>Public Health Action</i> 8(Supplement 1): S13-S17.                                       | No EBS system (as defined for this paper) described | Systematic search      | Peer-reviewed publication    |
| CARE: Promising Practices for Community-based Surveillance. Experiences from CARE's work with community-based models of avian and human influenza surveillance in five countries. 2008.                                              | Does not present data collected with EBS            | Grey literature search | Agency report                |
| Unpublished manuscript on EBS, identified through TEPHINET                                                                                                                                                                           | No permission for inclusion                         | Grey literature search | Manuscript under peer-review |

|                                                                                                                                                                                                                  |                                                               |                                            |                              |
|------------------------------------------------------------------------------------------------------------------------------------------------------------------------------------------------------------------|---------------------------------------------------------------|--------------------------------------------|------------------------------|
| Unpublished report on EBS, identified through TEPHINET                                                                                                                                                           | Full-text/<br>additional information could not<br>be obtained | Presentation/<br>Grey literature<br>search | Agency report                |
| Bilal, N. e. a. (2011). Health extension workers in Ethiopia: improved access and coverage for the rural poor. Yes Africa can: success stories from a dynamic continent. P. A. Chuhan-Pole, M, The World Bank.   | No EBS system (as defined for this paper) described           | Backwards<br>citation search               | Peer-reviewed<br>publication |
| Broome, C. (2007). "Technical Note on Disease Surveillance and Epidemiology, INdia IDSP, Mid term Review Aide Memoire."                                                                                          | Does not present data collected with EBS                      | Backwards<br>citation search               | Peer-reviewed<br>publication |
| CARE (2003). "CARE Vietnam's Community BAsed Surveillance Model: Bringing the fight to flu. A case study of outbreak detection and rapid response to Avian Influenzy in Vietnam's Haiphong province."            | Does not present data collected with EBS                      | Backwards<br>citation search               | Agency report                |
| CDC (2005). "Rapid health response, assessment, and surveillance after a tsunami--Thailand, 2004-2005." MMWR Morb Mortal Wkly Rep 54(3): 61-64.                                                                  | No EBS system (as defined for this paper) described           | Backwards<br>citation search               | Peer-reviewed<br>publication |
| CDC (2010). "Launching a National Surveillance System after an earthquake --- Haiti, 2010." MMWR Morb Mortal Wkly Rep 59(30): 933-938.                                                                           | Does not present data collected with EBS                      | Backwards<br>citation search               | Peer-reviewed<br>publication |
| CDC (2010). "Rapid establishment of an internally displaced persons disease surveillance system after an earthquake --- Haiti, 2010." MMWR Morb Mortal Wkly Rep 59(30): 939-945.                                 | No EBS system (as defined for this paper) described           | Backwards<br>citation search               | Peer-reviewed<br>publication |
| Chan, E. H., et al. (2010). "Global capacity for emerging infectious disease detection." Proc Natl Acad Sci U S A 107(50): 21701-21706.                                                                          | No EBS system (as defined for this paper) described           | Backwards<br>citation search               | Peer-reviewed<br>publication |
| Curry, D. B., F; Coates, E; Altman, P (2013). "Reaching beyond the health post: community-based surveillance for polio eradication." Dev Pract 23: 69-78.                                                        | No EBS system (as defined for this paper) described           | Backwards<br>citation search               | Peer-reviewed<br>publication |
| Ghebreyesus, T. A., et al. (2000). "The community-based malaria control programme in Tigray, northern Ethiopia. A review of programme set-up, activities, outcomes and impact." Parassitologia 42(3-4): 255-290. | No EBS system (as defined for this paper) described           | Backwards<br>citation search               | Peer-reviewed<br>publication |
| Grein, T. W., et al. (2000). "Rumors of disease in the global village: outbreak verification." Emerg Infect Dis 6(2): 97-102.                                                                                    | No LMIC                                                       | Backwards<br>citation search               | Peer-reviewed<br>publication |

|                                                                                                                                                                                                                                                  |                                                                       |                           |                           |
|--------------------------------------------------------------------------------------------------------------------------------------------------------------------------------------------------------------------------------------------------|-----------------------------------------------------------------------|---------------------------|---------------------------|
| Jaravaza, V. S., et al. (1982). "Unified National Health Information System. Part II. The Village Health Worker Health Information System." <i>Cent Afr J Med</i> 28(3): 57-65.                                                                  | No EBS system (as defined for this paper) described                   | Backwards citation search | Peer-reviewed publication |
| Lamunu, M., et al. (2004). "Containing a haemorrhagic fever epidemic: the Ebola experience in Uganda (October 2000-January 2001)." <i>Int J Infect Dis</i> 8(1): 27-37.                                                                          | No EBS system (as defined for this paper) described                   | Backwards citation search | Peer-reviewed publication |
| O'Neill, K. (1993). <i>Community-based surveillance: a critical examination of nine case-studies.</i> London School of Hygiene and Tropical Medicine. London, University of London.                                                              | Full-text/ Presentation/ additional information could not be obtained | Backwards citation search | Master thesis             |
| Truelove, S. A., et al. (2015). "Mitigating measles outbreaks in West Africa post-Ebola." <i>Expert Rev Anti Infect Ther</i> 13(11): 1299-1301.                                                                                                  | No EBS system (as defined for this paper) described                   | Backwards citation search | Peer-reviewed publication |
| Valyasevi, A. W., P; Dhanamitta, S (1995). "Community-based surveillance for action towards health and nutrition: experience in Thailand." <i>Food and Nutrition Bulletin</i> 16: 120-125.                                                       | No EBS system (as defined for this paper) described                   | Backwards citation search | Peer-reviewed publication |
| WHO (2017). "Joint external evaluation of IHR core capacities of Viet Nam."                                                                                                                                                                      | Does not present data collected with EBS                              | Backwards citation search | WHO publication           |
| Brinkel J, Kramer A, Krumkamp R, May J, Fobil J. Mobile phone-based mHealth approaches for public health surveillance in sub-Saharan Africa: a systematic review. <i>Int J Environ Res Public Health</i> . 2014;11(11):11559-82.                 | No EBS system (as defined for this paper) described                   | Backwards citation search | Peer-reviewed publication |
| Freifeld CC, Chunara R, Mekaru SR, Chan EH, Kass-Hout T, Ayala Iacucci A, et al. Participatory epidemiology: use of mobile phones for community-based health reporting. <i>PLoS Med</i> . 2010;7(12):e1000376.                                   | No EBS system (as defined for this paper) described                   | Backwards citation search | Peer-reviewed publication |
| Issah K, Nartey K, Amoah R, Bachan EG, Aleeba J, Yeetey E, et al. Assessment of the usefulness of integrated disease surveillance and response on suspected ebola cases in the Brong Ahafo Region, Ghana. <i>Infect Dis Poverty</i> . 2015;4:17. | No EBS system (as defined for this paper) described                   | Backwards citation search | Peer-reviewed publication |
