# Supplementary material for: Event-based surveillance at health facility and community level in low-income and middle-income countries: a systematic review
Source: PubMed Central journal article supplement — BMJ Glob Health. 2019 Dec 10;4(6):e001878. doi: 10.1136/bmjgh-2019-001878 (PMC6936563; doi:10.1136/bmjgh-2019-001878), 2019-12-10
Supplement: bmjgh-2019-001878supp003.pdf [file bmjgh-2019-001878supp003.pdf]

Kuehne A, Keating P, Polonsky J, Haskew C, Schenkel K, le Polain de Waroux O, Ratnayake R: Event-based surveillance in low- and middle-income countries: a systematic review

Supplementary file 3: Systematic literature review on event-based surveillance in the field: Studies included for review and their quality assessment according to GRADE and adapted CDC guidance for surveillance system evaluations (N=15)

| Setting          | Author and Title                                                                                                                                                                                                                                                                                                                     | GRADE quality of evidence | Quality of the description of the purpose and operation of the EBS system |                      |                        |                    |                      |                               |                       |                     |                           |                              | Quality of assessment of key elements of the surveillance system under evaluation |                     |                  |                    |               |               |                  |                  |               |                  |               |               |                                                    |
|------------------|--------------------------------------------------------------------------------------------------------------------------------------------------------------------------------------------------------------------------------------------------------------------------------------------------------------------------------------|---------------------------|---------------------------------------------------------------------------|----------------------|------------------------|--------------------|----------------------|-------------------------------|-----------------------|---------------------|---------------------------|------------------------------|-----------------------------------------------------------------------------------|---------------------|------------------|--------------------|---------------|---------------|------------------|------------------|---------------|------------------|---------------|---------------|----------------------------------------------------|
|                  |                                                                                                                                                                                                                                                                                                                                      |                           | Importance of event described                                             | Objectives described | Event under EBS stated | Use of data stated | Components described | Flow of information described | Integration described | Resources described | Feedback mechanism stated | Response mechanism described | Summary score                                                                     | Level of usefulness | Data quality     | Representativeness | PPV           | Sensitivity   | Acceptability    | Timeliness       | Simplicity    | Flexibility      | Stability     | Other         |                                                    |
| Outbreak setting | Ratnayake, R., et al. (2016). "Assessment of Community Event-Based Surveillance for Ebola Virus Disease, Sierra Leone, 2015." <i>Emerging Infectious Diseases</i> 22(8): 1431-1437. [21] & ERC. (2015). "Evaluation of the Functionality and Effectiveness of Community Event-Based Surveillance (CEBS) in Sierra Leone." [22]       |                           | 1                                                                         | 2                    | 2                      | 2                  | 2                    | 1                             | 2                     | 2                   | 0                         | 1                            | 15                                                                                | Partly evaluated    | Not evaluated    | Not evaluated      | Evaluated     | Evaluated     | Not evaluated    | Partly evaluated | Not evaluated | Not evaluated    | Not evaluated | Not evaluated | Not evaluated                                      |
|                  | Stone, E., et al. (2016). "Community Event-Based Surveillance for Ebola Virus Disease in Sierra Leone: Implementation of a National-Level System During a Crisis." <i>PLoS currents</i> 8. [19] & ERC (2015). "Evaluation of the Functionality and Effectiveness of Community Event-Based Surveillance (CEBS) in Sierra Leone." [22] | Very low                  | 1                                                                         | 2                    | 2                      | 1                  | 2                    | 2                             | 2                     | 0                   | 0                         | 0                            | 12                                                                                | Not evaluated       | Evaluated        | Not evaluated      | Not evaluated | Not evaluated | Evaluated        | Not evaluated    | Not evaluated | Not evaluated    | Not evaluated | Not evaluated | Process evaluation of implementation evaluated     |
|                  | Lee, C. T., et al. (2016). "Evaluation of a National Call Centre and a Local Alerts System for Detection of New Cases of Ebola Virus Disease - Guinea, 2014-2015." <i>MMWR. Morbidity and mortality weekly report</i> 65(9): 227-230. [20]                                                                                           | Very low                  | 1                                                                         | 2                    | 2                      | 1                  | 1                    | 0                             | 2                     | 0                   | 0                         | 0                            | 9                                                                                 | Not evaluated       | Not evaluated    | Not evaluated      | Not evaluated | Evaluated     | Not evaluated    | Not evaluated    | Not evaluated | Not evaluated    | Not evaluated | Not evaluated | Not evaluated                                      |
|                  | Miller, L. A., et al. (2015). "Use of a nationwide call centre for Ebola response and monitoring during a 3-day house-to-house campaign - Sierra Leone, September 2014." <i>MMWR. Morbidity and mortality weekly report</i> 64(1): 28-29. [23]                                                                                       | Low                       | 1                                                                         | 2                    | 2                      | 2                  | 2                    | 0                             | 2                     | 0                   | 0                         | 2                            | 13                                                                                | Not evaluated       | Not evaluated    | Not evaluated      | Not evaluated | Not evaluated | Not evaluated    | Not evaluated    | Not evaluated | Not evaluated    | Not evaluated | Not evaluated | Response evaluated                                 |
|                  | Santa-Olalla, P., et al. (2013). "Implementation of an alert and response system in Haiti during the early stage of the response to the cholera epidemic." <i>The American journal of tropical medicine and hygiene</i> 89(4): 688-697. [28]                                                                                         | Very low                  | 2                                                                         | 2                    | 2                      | 2                  | 2                    | 2                             | 2                     | 2                   | 2                         | 2                            | 20                                                                                | Evaluated           | Partly evaluated | Not evaluated      | Not evaluated | Not evaluated | Partly evaluated | Not evaluated    | Not evaluated | Partly evaluated | Not evaluated | Not evaluated | Exit strategy evaluated                            |
| Routine setting  | Clara A et al: Factors Influencing Community Event-based Surveillance: Lessons Learned from Pilot Implementation in Vietnam. <i>Health Security Volume 16, Number 51, 2018. DOI: 10.1089/hs.2018.0066 (not published yet)</i> [15]                                                                                                   | Very low                  | 2                                                                         | 2                    | 2                      | 2                  | 2                    | 2                             | 2                     | 2                   | 1                         | 1                            | 18                                                                                | Not evaluated       | Not evaluated    | Not evaluated      | Evaluated     | Not evaluated | Partly evaluated | Not evaluated    | Not evaluated | Not evaluated    | Not evaluated | Not evaluated | Factors influencing event incidence rate evaluated |

|                                                                                                                                                                                                                                                                                                                                                                                                                      |          |   |   |   |   |   |   |   |   |   |   |   |    |                  |                  |               |                  |                  |                  |                  |               |               |               |                                                                       |
|----------------------------------------------------------------------------------------------------------------------------------------------------------------------------------------------------------------------------------------------------------------------------------------------------------------------------------------------------------------------------------------------------------------------|----------|---|---|---|---|---|---|---|---|---|---|---|----|------------------|------------------|---------------|------------------|------------------|------------------|------------------|---------------|---------------|---------------|-----------------------------------------------------------------------|
| Clara, A., et al. (2018). "Event-Based Surveillance at Community and Healthcare Facilities, Vietnam, 2016-2017." <i>Emerging Infectious Diseases</i> 24(9): 1649-1658. [16]                                                                                                                                                                                                                                          | Very low | 2 | 1 | 2 | 2 | 2 | 2 | 2 | 2 | 2 | 0 | 1 | 16 | Partly evaluated | Not evaluated    | Not evaluated | Partly evaluated | Not evaluated    | Evaluated        | Evaluated        | Not evaluated | Not evaluated | Not evaluated | Sustainability partly evaluated                                       |
| Merali, S., et al. (2018). "Lessons Learned from Community Event-Based Surveillance Implementation in Ghana." <i>ICEID</i> . 26.-29.08.2018 Atlanta                                                                                                                                                                                                                                                                  | Very low | 2 | 2 | 2 | 1 | 2 | 2 | 2 | 1 | 0 | 0 | 0 | 14 | Not evaluated    | Not evaluated    | Not evaluated | Partly evaluated | Not evaluated    | Not evaluated    | Not evaluated    | Not evaluated | Not evaluated | Not evaluated | Lessons learned partly evaluated                                      |
| Larsen, TM, et al. (2017). "Red Cross volunteers' experience with a mobile community event-based surveillance (CEBS) system in Sierra Leone during-and after the Ebola outbreak- A qualitative study". <i>Health Prim Car</i> 1(3):1-7. [17] & (2016). "A Qualitative Study of Volunteer Experiences With a Mobile Community Event based Surveillance (CEBS) System In Sierra Leone." <i>IJD</i> 53 Suppl: S116 [18] | Very low | 1 | 1 | 1 | 1 | 2 | 2 | 1 | 0 | 0 | 0 | 1 | 10 | Not evaluated    | Not evaluated    | Not evaluated | Not evaluated    | Not evaluated    | Evaluated        | Not evaluated    | Not evaluated | Not evaluated | Not evaluated | Volunteer experiences and lessons learned evaluated                   |
| Toyama, Y., et al. (2015). "Event-based surveillance in north-western Ethiopia: experience and lessons learnt in the field." <i>Western Pacific surveillance and response journal: WPSAR</i> 6(3): 22-27. [24]                                                                                                                                                                                                       | Very low | 0 | 1 | 2 | 1 | 2 | 1 | 2 | 2 | 0 | 2 | 2 | 13 | Evaluated        | Partly evaluated | Not evaluated | Evaluated        | Partly evaluated | Partly evaluated | Evaluated        | Not evaluated | Not evaluated | Not evaluated | Not evaluated                                                         |
| Oum, S., et al. (2005). "Community-based surveillance: a pilot study from rural Cambodia." <i>Tropical Medicine &amp; International Health</i> 10(7): 689-697. [30]                                                                                                                                                                                                                                                  | Very low | 2 | 2 | 2 | 2 | 1 | 2 | 2 | 2 | 2 | 1 | 1 | 18 | Not evaluated    | Not evaluated    | Not evaluated | Evaluated        | Not evaluated    | Not evaluated    | Not evaluated    | Not evaluated | Not evaluated | Not evaluated | Resources needed: Costs and Training evaluated                        |
| Naser, A. M., et al. (2015). "Integrated cluster- and case-based surveillance for detecting stage III zoonotic pathogens: an example of Nipah virus surveillance in Bangladesh." <i>Epidemiology &amp; Infection</i> 143(9): 1922-1930. [26]                                                                                                                                                                         | Low.     | 2 | 2 | 2 | 2 | 1 | 1 | 1 | 1 | 0 | 2 | 2 | 15 | Not evaluated    | Not evaluated    | Not evaluated | Partly evaluated | Partly evaluated | Not evaluated    | Not evaluated    | Not evaluated | Not evaluated | Not evaluated | Not evaluated                                                         |
| Sharma, R., et al. (2009). "Communicable disease outbreak detection by using supplementary tools to conventional surveillance methods under Integrated Disease Surveillance Project (IDSP), India." <i>Journal of Communicable Diseases</i> 41(3): 149-159. [29]                                                                                                                                                     | Very low | 1 | 1 | 2 | 0 | 1 | 0 | 0 | 0 | 0 | 0 | 0 | 5  | Not evaluated    | Not evaluated    | Not evaluated | Partly evaluated | Not evaluated    | Not evaluated    | Not evaluated    | Not evaluated | Not evaluated | Not evaluated | Not evaluated                                                         |
| Tante, S., et al. (2015). "Which surveillance systems were operational after Typhoon Haiyan?" <i>Western Pacific surveillance and response journal: WPSAR</i> 6(Supplement 1): 66-70. [25]                                                                                                                                                                                                                           | Very low | 0 | 2 | 1 | 0 | 1 | 1 | 1 | 0 | 0 | 0 | 0 | 6  | Not evaluated    | Not evaluated    | Not evaluated | Not evaluated    | Not evaluated    | Not evaluated    | Not evaluated    | Not evaluated | Not evaluated | Evaluated     | Complementary function of IBS, EBS & syndromic surv. partly evaluated |
| Dagina, R., et al. (2013). "Event-based surveillance in Papua New Guinea: strengthening an International Health Regulations (2005) core capacity." <i>Western Pacific surveillance and response journal: WPSAR</i> 4(3): 19-25. [27]                                                                                                                                                                                 | Very low | 1 | 1 | 1 | 1 | 2 | 1 | 2 | 1 | 2 | 1 | 1 | 13 | Partly evaluated | Not evaluated    | Not evaluated | Evaluated        | Not evaluated    | Not evaluated    | Partly evaluated | Not evaluated | Not evaluated | Not evaluated | Laboratory confirmation evaluated                                     |
